# Supplementary material
Source: Elsevier journal article supplement (https://www.sciencedirect.com/science/article/pii/S1853002815000944)
Supplement: mmc1 [file S1853002815000944:mmc1.doc]

**ANEXO I**

**CUESTIONARIO SAFAR ACV**

01. Datos demográficos

Nombre:

Edad:

Sexo :

02.¿Qué nivel educativo más alto cursa o cursó?

| Ninguno |  |
| --- | --- |
| Primario |  |
| EGB |  |
| Secundario |  |
| Polimodal |  |
| Superior no universitario |  |
| Universitario |  |
| Post universitario |  |
| Educación especial |  |

03. ¿Cual es el último grado o año que aprobó en ese nivel?

| Grado o año |  |
| --- | --- |
| Ninguno |  |
| Ignorado |  |

04. ¿Cuándo fue la última vez que fumó?

| Hace un día o menos |  |
| --- | --- |
| Mas de un día y menos de un mes |  |
| Entre 1 y 6 meses |  |
| Entre 7 meses y 1 ano |  |
| Mas de 1 ano |  |

05. ¿Alguna vez le han tomado la presión arterial?

Si

No

No sabe o no contesta

06. ¿Cuando fue la ultima vez que le tomaron la presión arterial?

| Menos de 6 meses |  |
| --- | --- |
| Menos de un ano |  |
| Entre 1 y 2 anos |  |
| Mas de 2 anos |  |
| No sabe o no contesta |  |

07. ¿Cuantas veces un medico, una enfermera u otro profesional de la salud le dijo que tenía la presión alta?

| Solo una vez |  |
| --- | --- |
| Mas de una vez |  |
| Ninguna |  |
| No sabe o no contesta |  |

08. ¿En estos momentos esta haciendo algún tratamiento (medicamentos, dieta, ejercicio) indicado por un profesional de la salud para controlar su presión arterial?

Si

No

09. ¿Ha consumido alguna bebida alcohólica, como por ejemplo vino, cerveza, whisky o parecidos (vodka, ron) en los últimos 30 días?

Si

No (Pase a la pregunta 13)

No sabe no contesta

10. ¿Con que frecuencia tomo alguna bebida alcohólica en los últimos 30 días? (complete sólo una opción)

| Días por semana... |  |
| --- | --- |
| Días por mes... |  |
| No sabe o no contesta |  |

11. Los días que toma ¿Cuánto acostumbra tomar por día de…?

Cerveza

No toma

Cantidad de tragos

1 latita= 1 trago; 1 litr0 = 3 tragos; % litro = 2,3 tragos

Vino

No toma

Cantidad de tragos

1 copa= 1 trago; *vi* litro= 3 tragos; % litro=4,5 tragos; 1 litro = 6 tragos

Bebidas fuertes (licores, whisky, vodka, gin o similares)

No toma

Cantidad de tragos

1 medida= 1 trago; *va* litro= 6 tragos; *vi* litro= 12 tragos; 1 litro = 24 tragos

Otras bebidas

No toma

Si

¿Cuáles?______________________________________________________________________

12. En algunas ocasiones, es posible que usted tome más de lo habitual. En los últimos 30 días, ¿cuánto tomó el día que más tomó?

Cerveza

No tomo mas de lo habitual

Cantidad de tragos

1 latita= 1 trago; 1 litro = 3 tragos; ¾ litro = 2,3 tragos

Vino

No tomo mas de lo habitual

Cantidad de tragos

1 copa= 1 trago; 1/2 litro= 3 tragos; ¾ litro=4,5 tragos; 1 litro = 6 tragos

Bebidas fuertes (licores, whisky, vodka, gin o similares)

No tomo mas de lo habitual

Cantidad de tragos

1 medida= 1 trago; ¼ litro= 6 tragos; ½ litro= 12 tragos; 1 litro = 24 tragos

Otras bebidas

No toma

Si

¿cuáles?______________________________________________________________________

13. ¿Alguna vez un doctor, una enfermera u otro profesional de la salud le dijo que tenía diabetes o azúcar alta en la sangre?

Si

No

No sabe o no contesta

14. En estos momentos esta haciendo algún tratamiento (medicamentos, dieta, ejercicio) indicado por un profesional de la salud para mantener controlada su diabetes/azúcar en sangre

Si

No

15. ¿Cuando fue la ultima vez que le midieron glucemia/azúcar con análisis de sangre?

| Menos de 6 meses |  |
| --- | --- |
| Menos de un ano |  |
| Entre 1 y 2 anos |  |
| Mas de 2 anos |  |
| Nunca se la midió |  |
| No sabe o no contesta |  |

16. ¿Alguna vez un doctor, una enfermera u otro profesional de la salud le dijo que tenía el colesterol alto o elevado en sangre?

Si

No

No sabe o no contesta

17. ¿Cuando fue la ultima vez que le midieron el colesterol con análisis de sangre?

Menos de 6 meses

Menos de un ano

Entre 1 y 2 anos

Mas de 2 anos

Nunca se la midió

No sabe o no contesta

18. ¿Recibió la vacuna antigripal este ano?

Si

No

No sabe o no contesta

19. A continuación, dígame que enfermedades o conductas cree que aumentan el riesgo de tener un ataque cerebral, embolia, ACV, derrame cerebral o hemiplejía

20. De la siguiente lista, dígame que enfermedades o conductas considera usted que en general, para cualquier persona, aumentan el riesgo de padecer un ataque cerebral, embolia, ACV, derrame cerebral o hemiplejía (S=si; n = no; ns=no sabe)

| 01. Colesterol elevado |  |  | 13. El estrés |  |
| --- | --- | --- | --- | --- |
| 02. Formación de Coágulos/trombosis |  |  | 14. Tomar mate |  |
| 03. Golpes en la cabeza |  |  | 15. El alcoholismo |  |
| 04. Las adicciones a drogas |  |  | 16. Tomar cafe |  |
| 05. La obesidad |  |  | 17. Hipertensión arterial |  |
| 06. Comer con sal |  |  | 18. Diabetes |  |
| 07. Los aneurismas cerebrales o dilatación de una arteria del cerebro |  |  | 19. Mala alimentación (comer con mucha grasa) |  |
| 08. El sedentarismo |  |  | 20. Aterosclerosis |  |
| 09. Tomar sol |  |  | 21 tomar te |  |
| 10. Enfermedades cardiacas |  |  |  |  |
| 11. Enfermedades genéticas |  |  |  |  |
| 12. Fumar |  |  |  |  |

21. A continuación, dígame los síntomas con los que usted crea que puede presentarse un ataque cerebral, embolia, ACV, derrame cerebral o hemiplejía:

22. De la siguiente lista, dígame cuales pueden ser síntomas de un ataque cerebral, embolia, ACV, derrame cerebral o hemiplejía (S=si; n = no; ns=no sabe)

| 01. Dificultades para mover partes del cuerpo |  |  | 13. Perdida de conocimiento |  |
| --- | --- | --- | --- | --- |
| 02. Palpitaciones |  |  | 14. Hipertensión arterial |  |
| 03. Alteración de la vision |  |  | 15. Hormigueos |  |
| 04. Vómitos |  |  | 16. Torpeza en manos o piernas |  |
| 05. Fatiga |  |  | 17. Sudoracion o transpiración |  |
| 06. Perida de memoria |  |  | 18. Adormecimiento de cara o cuerpo |  |
| 07. Dificultad para hablar |  |  | 19. Mareos o vértigo |  |
| 08. Dolor de cabeza |  |  |  |  |
| 09. Desmayo |  |  |  |  |
| 10. Parálisis |  |  |  |  |
| 11. Dolor muscular |  |  |  |  |
| 12. Dolor de pecho |  |  |  |  |

23. ¿Sabe cual es el mecanismo o por que se produce el ataque cerebral, embolia, ACV, derrame cerebral o hemiplejía?

Si

No

24. ¿Tuvo usted un ataque cerebral, embolia, ACV, derrame cerebral o hemiplejía

Si

No

No sabe o no contesta

25. ¿Algún familiar cercano tuvo un ataque cerebral, embolia, ACV, derrame cerebral o hemiplejía?

Si

No

**ANEXO II**

**CUESTIONARIO STAT (STROKE ACTION TEST)**

Nombre:

Edad:

Sexo :

Si esto le sucediera a una persona adulta amiga o familiar ¿Que haría? (Elija una de las opciones para cada situación)

| 1. Dificultad repentina para ver de uno de los ojos. | Llamar a la ambulancia | Llamar al consultorio del médico personal, ir a verlo o ir a la guardia | Esperar una hora en casa, luego decidir | Esperar un día en casa, luego decidir |
| --- | --- | --- | --- | --- |
| 2. Ella de golpe se volvió torpe, no podía sacar las llaves de su cartera. | Llamar a la ambulancia | Llamar al consultorio del médico personal, ir a verlo o ir a la guardia | Esperar una hora en casa, luego decidir | Esperar un día en casa, luego decidir |
| 3. Sintió palpitaciones o latidos irregulares de golpe. | Llamar a la ambulancia | Llamar al consultorio del médico personal, ir a verlo o ir a la guardia | Esperar una hora en casa, luego decidir | Esperar un día en casa, luego decidir |
| 4. Mientras estábamos mirando TV ella dijo que comenzó a ver doble. Me dijo que la habitación estaba girando y que sentía mareada. No parecía borracha. Ella se agarró de mi brazo y lo sostuvo firmemente. | Llamar a la ambulancia | Llamar al consultorio del médico personal, ir a verlo o ir a la guardia | Esperar una hora en casa, luego decidir | Esperar un día en casa, luego decidir |
| 5. Adormecimiento repentino de una pierna, especialmente de un lado. | Llamar a la ambulancia | Llamar al consultorio del médico personal, ir a verlo o ir a la guardia | Esperar una hora en casa, luego decidir | Esperar un día en casa, luego decidir |
| 6. Mareo repentino. | Llamar a la ambulancia | Llamar al consultorio del médico personal, ir a verlo o ir a la guardia | Esperar una hora en casa, luego decidir | Esperar un día en casa, luego decidir |
| 7. Por unos minutos se escuchaba como si las personas estuvieran hablando algún idioma extranjero. No podría comprenderlos, y parecía que ellos tampoco me entendían a mí. | Llamar a la ambulancia | Llamar al consultorio del médico personal, ir a verlo o ir a la guardia | Esperar una hora en casa, luego decidir | Esperar un día en casa, luego decidir |
| 8. Un conocido se queja de dolor y adormecimiento de la mano al levantar peso, pero igual lo pudo hacer. | Llamar a la ambulancia | Llamar al consultorio del médico personal, ir a verlo o ir a la guardia | Esperar una hora en casa, luego decidir | Esperar un día en casa, luego decidir |
| 9. Las articulaciones de sus dedos estaban doloridas y luego se le endurecieron los dedos y no podría abrir la mano. | Llamar a la ambulancia | Llamar al consultorio del médico personal, ir a verlo o ir a la guardia | Esperar una hora en casa, luego decidir | Esperar un día en casa, luego decidir |
| 10. Atendí el teléfono y me di cuenta de que hablaba como borracho. No podía hablar claramente a pesar de esforzarme mucho. No había tomado alcohol. | Llamar a la ambulancia | Llamar al consultorio del médico personal, ir a verlo o ir a la guardia | Esperar una hora en casa, luego decidir | Esperar un día en casa, luego decidir |

| 11. Se vía pálida. Ella dijo que sentía como si su corazón latiera rápido y salteara latidos. | Llamar a la ambulancia | Llamar al consultorio del médico personal, ir a verlo o ir a la guardia | Esperar una hora en casa, luego decidir | Esperar un día en casa, luego decidir |
| --- | --- | --- | --- | --- |
| 12. Sentí un hormigueo en mi pierna izquierda mientras estaba sentado mirando TV. Fue extraño, como si mi pierna estuviera quedando dormida. Traté de frotar y sacudir la pierna la pierna pero el problema no pasó | Llamar a la ambulancia | Llamar al consultorio del médico personal, ir a verlo o ir a la guardia | Esperar una hora en casa, luego decidir | Esperar un día en casa, luego decidir |
| 13. Se sentía como si un elefante estuviera sentado sobre mi pecho. Dolía cada vez más. | Llamar a la ambulancia | Llamar al consultorio del médico personal, ir a verlo o ir a la guardia | Esperar una hora en casa, luego decidir | Esperar un día en casa, luego decidir |
| 14. Debilidad repentina de un brazo, sobre todo de un lado | Llamar a la ambulancia | Llamar al consultorio del médico personal, ir a verlo o ir a la guardia | Esperar una hora en casa, luego decidir | Esperar un día en casa, luego decidir |
| 15. Vi que él estaba tratando de comer y se la caía la comida por el lado derecho de la boca. Eso nunca había sucedido | Llamar a la ambulancia | Llamar al consultorio del médico personal, ir a verlo o ir a la guardia | Esperar una hora en casa, luego decidir | Esperar un día en casa, luego decidir |
| 16. Confusión repentina | Llamar a la ambulancia | Llamar al consultorio del médico personal, ir a verlo o ir a la guardia | Esperar una hora en casa, luego decidir | Esperar un día en casa, luego decidir |
| 17. Mareos y problemas para ver repentinos | Llamar a la ambulancia | Llamar al consultorio del médico personal, ir a verlo o ir a la guardia | Esperar una hora en casa, luego decidir | Esperar un día en casa, luego decidir |
| 18. Dificultad repentina para entender | Llamar a la ambulancia | Llamar al consultorio del médico personal, ir a verlo o ir a la guardia | Esperar una hora en casa, luego decidir | Esperar un día en casa, luego decidir |
| 19. Deseo frecuente de orina, con sensación quemante y orina turbia | Llamar a la ambulancia | Llamar al consultorio del médico personal, ir a verlo o ir a la guardia | Esperar una hora en casa, luego decidir | Esperar un día en casa, luego decidir |
| 20. Repentinamente no pude alcanzar mi cartera porque no podría hacer que mi brazo derecho se moviera. Comencé a babear por la comisura labial. Cuando traté de llamar a mi marido para pedirle ayuda, las palabras no salían bien | Llamar a la ambulancia | Llamar al consultorio del médico personal, ir a verlo o ir a la guardia | Esperar una hora en casa, luego decidir | Esperar un día en casa, luego decidir |
| 21. Dolor de cabeza intenso, repentino, sin causa conocida. | Llamar a la ambulancia | Llamar al consultorio del médico personal, ir a verlo o ir a la guardia | Esperar una hora en casa, luego decidir | Esperar un día en casa, luego decidir |

| 22. Dificultad repentina para hablar | Llamar a la ambulancia | Llamar al consultorio del médico personal, ir a verlo o ir a la guardia | Esperar una hora en casa, luego decidir | Esperar un día en casa, luego decidir |
| --- | --- | --- | --- | --- |
| 23. Dolor de pecho que dura algunos minutos o con intensidad en aumento. | Llamar a la ambulancia | Llamar al consultorio del médico personal, ir a verlo o ir a la guardia | Esperar una hora en casa, luego decidir | Esperar un día en casa, luego decidir |
| 24. Me di cuenta de que él se tapaba y destapaba los ojos y parpadeaba. Me dijo “no puedo ver”. Unos minutos después todo volvió a la normalidad | Llamar a la ambulancia | Llamar al consultorio del médico personal, ir a verlo o ir a la guardia | Esperar una hora en casa, luego decidir | Esperar un día en casa, luego decidir |
| 25. Debilidad repentina en la cara, sobre todo en un lado. | Llamar a la ambulancia | Llamar al consultorio del médico personal, ir a verlo o ir a la guardia | Esperar una hora en casa, luego decidir | Esperar un día en casa, luego decidir |
| 26. Debilidad repentina del brazo y la cara, especialmente de un lado, junto con dificultad para hablar. | Llamar a la ambulancia | Llamar al consultorio del médico personal, ir a verlo o ir a la guardia | Esperar una hora en casa, luego decidir | Esperar un día en casa, luego decidir |
| 27. De repente mi brazo derecho no se movía. | Llamar a la ambulancia | Llamar al consultorio del médico personal, ir a verlo o ir a la guardia | Esperar una hora en casa, luego decidir | Esperar un día en casa, luego decidir |
| 28. Pérdida repentina de la coordinación. | Llamar a la ambulancia | Llamar al consultorio del médico personal, ir a verlo o ir a la guardia | Esperar una hora en casa, luego decidir | Esperar un día en casa, luego decidir |

Preguntas sobre Accidente cerebro vascular (ACV):

1 -2 -4 – 5 – 6 – 7 – 10 – 12 – 14 – 15 – 16 – 17 – 18 – 20 – 21 – 22 – 24 – 25 – 26 – 27 – 28.
