# Supplementary material
Source: Elsevier journal article supplement (https://www.sciencedirect.com/science/article/pii/S1853002815000944)
Supplement: mmc2 [file S1853002815000944:mmc2.pdf]

| If this happened to you or an ADULT friend/relative, what would you do? |                                                                                                                                                                                            |                         |                                        |                             |                            |
|-------------------------------------------------------------------------|--------------------------------------------------------------------------------------------------------------------------------------------------------------------------------------------|-------------------------|----------------------------------------|-----------------------------|----------------------------|
|                                                                         |                                                                                                                                                                                            | Call 911<br>immediately | Call Doctor's<br>office<br>immediately | Wait 1 HOUR,<br>then decide | Wait 1 DAY,<br>then decide |
| 1.                                                                      | Sudden trouble seeing in one eye.                                                                                                                                                          | 911                     | DR                                     | 1 HR                        | 1 DAY                      |
| 2.                                                                      | She suddenly got clumsy; she couldn't even get her keys out of her purse.                                                                                                                  | 911                     | DR                                     | 1 HR                        | 1 DAY                      |
| 3.                                                                      | Sudden irregular heart beat.                                                                                                                                                               | 911                     | DR                                     | 1 HR                        | 1 DAY                      |
| 4.                                                                      | While we were watching TV she said she started seeing double. She told me the room was spinning and she felt sick. She grabbed my arm and held on tight. She certainly didn't look drunk.  | 911                     | DR                                     | 1 HR                        | 1 DAY                      |
| 5.                                                                      | Sudden numbness of the leg, especially on one side.                                                                                                                                        | 911                     | DR                                     | 1 HR                        | 1 DAY                      |
| 6.                                                                      | Sudden dizziness.                                                                                                                                                                          | 911                     | DR                                     | 1 HR                        | 1 DAY                      |
| 7.                                                                      | It sounded like people were speaking some foreign language for a few minutes. I couldn't understand them, and they didn't seem to understand me either.                                    | 911                     | DR                                     | 1 HR                        | 1 DAY                      |
| 8.                                                                      | My gym partner complained about his right hand hurting and feeling numb while he was lifting weights. He was able to finish his workout anyway.                                            | 911                     | DR                                     | 1 HR                        | 1 DAY                      |
| 9.                                                                      | His finger joints were sore, and then a finger locked-up so he couldn't open his hand.                                                                                                     | 911                     | DR                                     | 1 HR                        | 1 DAY                      |
| 10.                                                                     | I answered the phone and realized I sounded drunk. I couldn't speak clearly no matter how hard I tried. I hadn't had any alcohol.                                                          | 911                     | DR                                     | 1 HR                        | 1 DAY                      |
| 11.                                                                     | She looked pale. She said it felt like her heart was fluttering and skipping beats.                                                                                                        | 911                     | DR                                     | 1 HR                        | 1 DAY                      |
| 12.                                                                     | My left leg started tingling as I sat watching TV. It was strange, almost like my leg was falling asleep. I tried rubbing and shaking my leg to make the problem go away, but it wouldn't. | 911                     | DR                                     | 1 HR                        | 1 DAY                      |
| 13.                                                                     | It felt like an elephant was sitting on my chest. It was getting more painful.                                                                                                             | 911                     | DR                                     | 1 HR                        | 1 DAY                      |

| <b>If this happened to you or an ADULT friend/relative, what would you do?</b>                                                                                                                                          |                                 |                                                 |                                     |                                    |
|-------------------------------------------------------------------------------------------------------------------------------------------------------------------------------------------------------------------------|---------------------------------|-------------------------------------------------|-------------------------------------|------------------------------------|
|                                                                                                                                                                                                                         | <b>Call 911<br/>immediately</b> | <b>Call Doctor's<br/>office<br/>immediately</b> | <b>Wait 1 HOUR,<br/>then decide</b> | <b>Wait 1 DAY,<br/>then decide</b> |
| 14. Sudden weakness of the arm especially on one side.                                                                                                                                                                  | 911                             | DR                                              | 1 HR                                | 1 DAY                              |
| 15. I saw that he was trying to eat lunch, but pieces of his sandwich kept falling out of the right side of his mouth. This hadn't ever happened before.                                                                | 911                             | DR                                              | 1 HR                                | 1 DAY                              |
| 16. Sudden confusion.                                                                                                                                                                                                   | 911                             | DR                                              | 1 HR                                | 1 DAY                              |
| 17. Sudden dizziness and trouble seeing.                                                                                                                                                                                | 911                             | DR                                              | 1 HR                                | 1 DAY                              |
| 18. Sudden trouble understanding.                                                                                                                                                                                       | 911                             | DR                                              | 1 HR                                | 1 DAY                              |
| 19. Frequent urge to urinate, a burning feeling during urination, and cloudy urine.                                                                                                                                     | 911                             | DR                                              | 1 HR                                | 1 DAY                              |
| 20. Suddenly I couldn't reach for my purse because I couldn't make my right arm move. I started drooling out of the corner of my mouth. When I tried calling to my husband for help, the words wouldn't come out right. | 911                             | DR                                              | 1 HR                                | 1 DAY                              |
| 21. Sudden severe headache with no known cause.                                                                                                                                                                         | 911                             | DR                                              | 1 HR                                | 1 DAY                              |
| 22. Sudden trouble speaking.                                                                                                                                                                                            | 911                             | DR                                              | 1 HR                                | 1 DAY                              |
| 23. Chest pain lasting more than a few minutes or increasing in intensity.                                                                                                                                              | 911                             | DR                                              | 1 HR                                | 1 DAY                              |
| 24. I noticed that he kept covering and uncovering his eyes and blinking. He told me, "I can't see." A few minutes later everything was fine again.                                                                     | 911                             | DR                                              | 1 HR                                | 1 DAY                              |
| 25. Sudden weakness of the face especially on one side.                                                                                                                                                                 | 911                             | DR                                              | 1 HR                                | 1 DAY                              |
| 26. Sudden weakness of the arm and face, especially on one side, together with trouble speaking.                                                                                                                        | 911                             | DR                                              | 1 HR                                | 1 DAY                              |
| 27. All of a sudden my right arm wouldn't move.                                                                                                                                                                         | 911                             | DR                                              | 1 HR                                | 1 DAY                              |
| 28. Sudden loss of coordination.                                                                                                                                                                                        | 911                             | DR                                              | 1 HR                                | 1 DAY                              |
